# Supplementary material for: Revealing Juan de Oviedo y de la Bandera’s Artworks: The Case of the Polychrome of a Stone-Carved Sculpture from the Madre de Dios Convent Façade in Seville
Source: MDPI journal article supplement (doi:10.3390/min14030225), 2024-02-23
Supplement: s1 [file s1]

Article

# Revealing Juan de Oviedo y de la Bandera's Artworks: The Case of the Polychrome of a Stone-Carved Sculpture from the Madre de Dios Convent Façade in Seville

## SUPPLEMENTARY MATERIALS

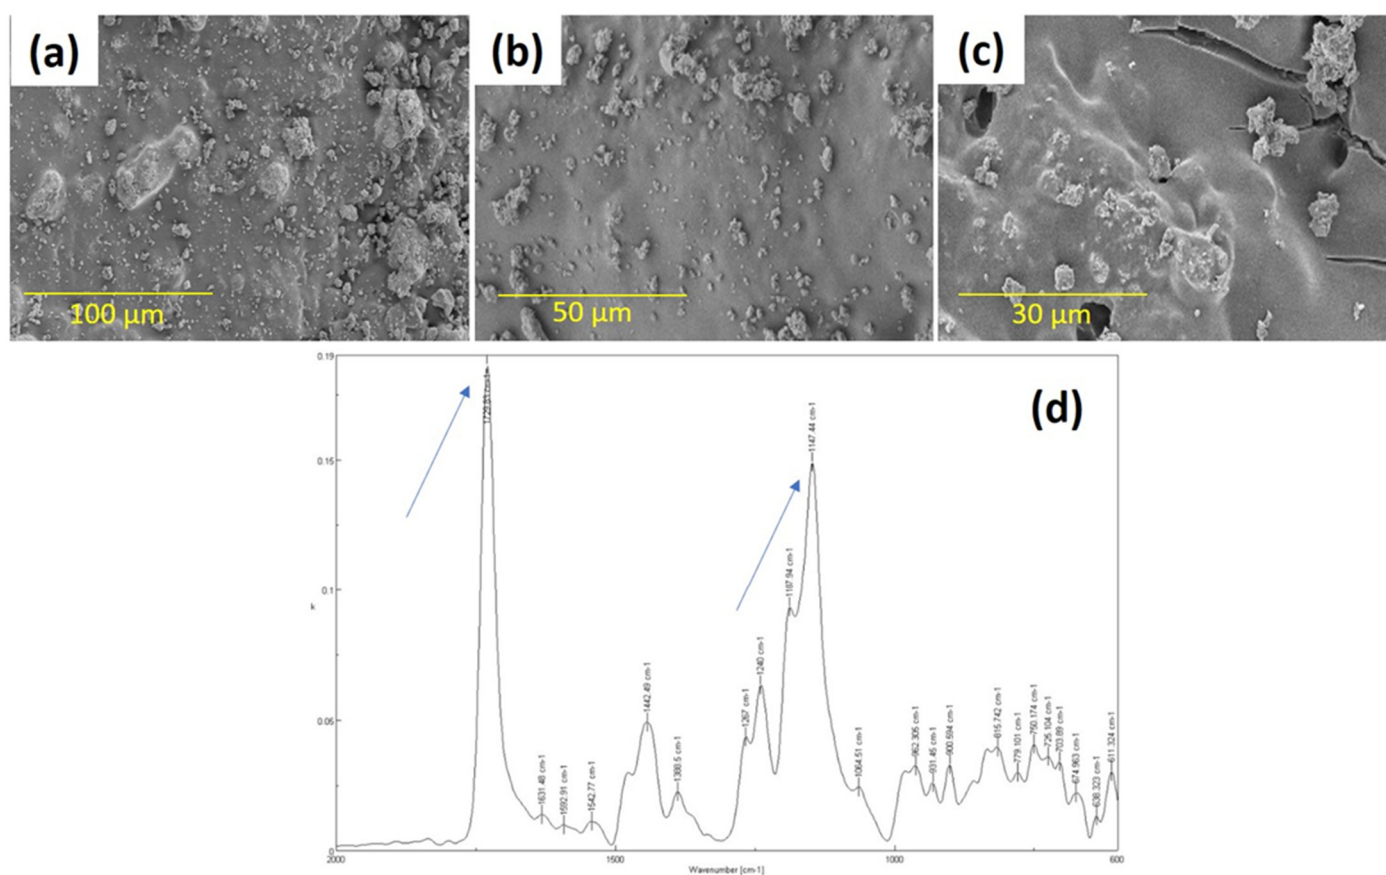

**Figure S1.** SEM micrographs showing the consolidating products on polychrome: (a) sample 2; (b) sample 4; (c) sample 5. IR spectrum corresponding to the consolidation product (d).

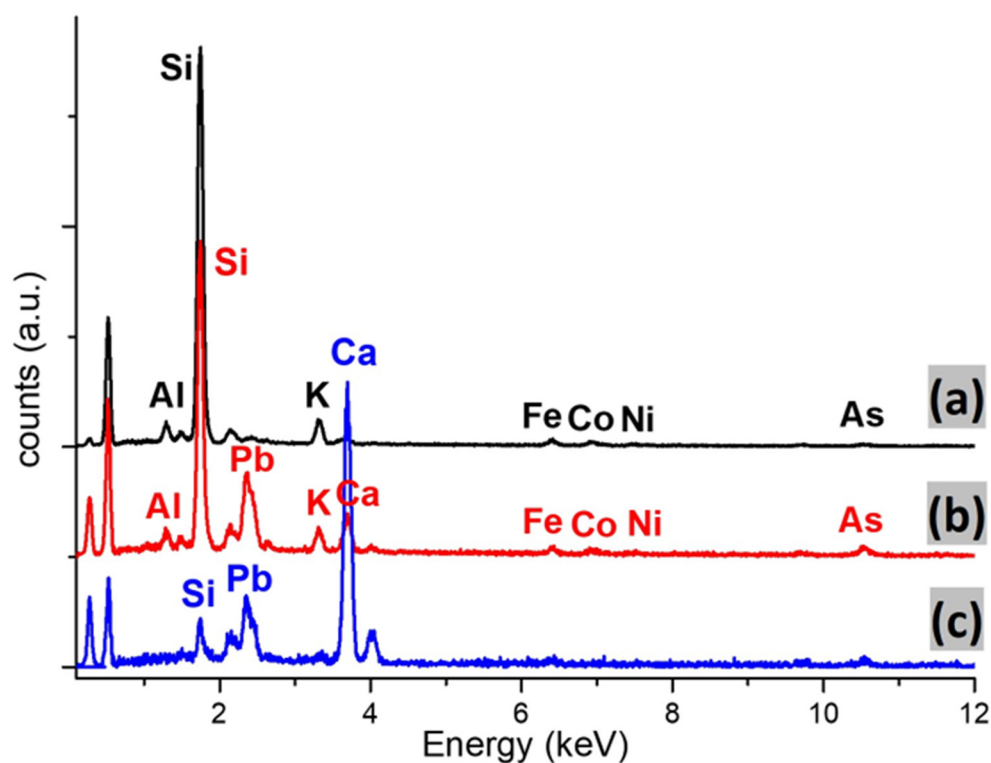

**Figure S2.** EDX spectra of the blue sample: (a) 1, punctual zone 1; (b) 1, punctual zone 2; (c) 1, general support layers.

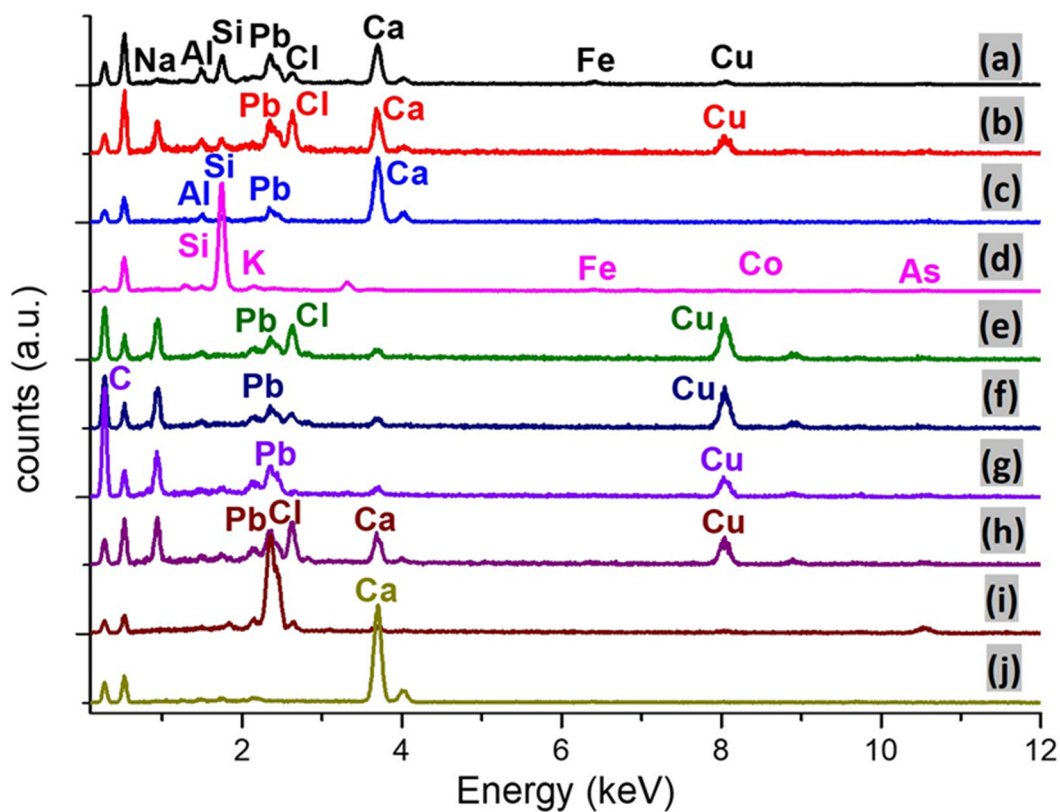

**Figure S3.** EDX spectra of the green samples: (a) 10, general; (b) 10, punctual zone 1; (c) 10, general support layers; (d) 4, punctual zone 1; (e) 4, punctual zone 2; (f) 4, punctual zone 3; (g) 5, punctual zone 1; (h) 5, punctual zone 2; (i) 5, general support layer; (j) 5, stone support.

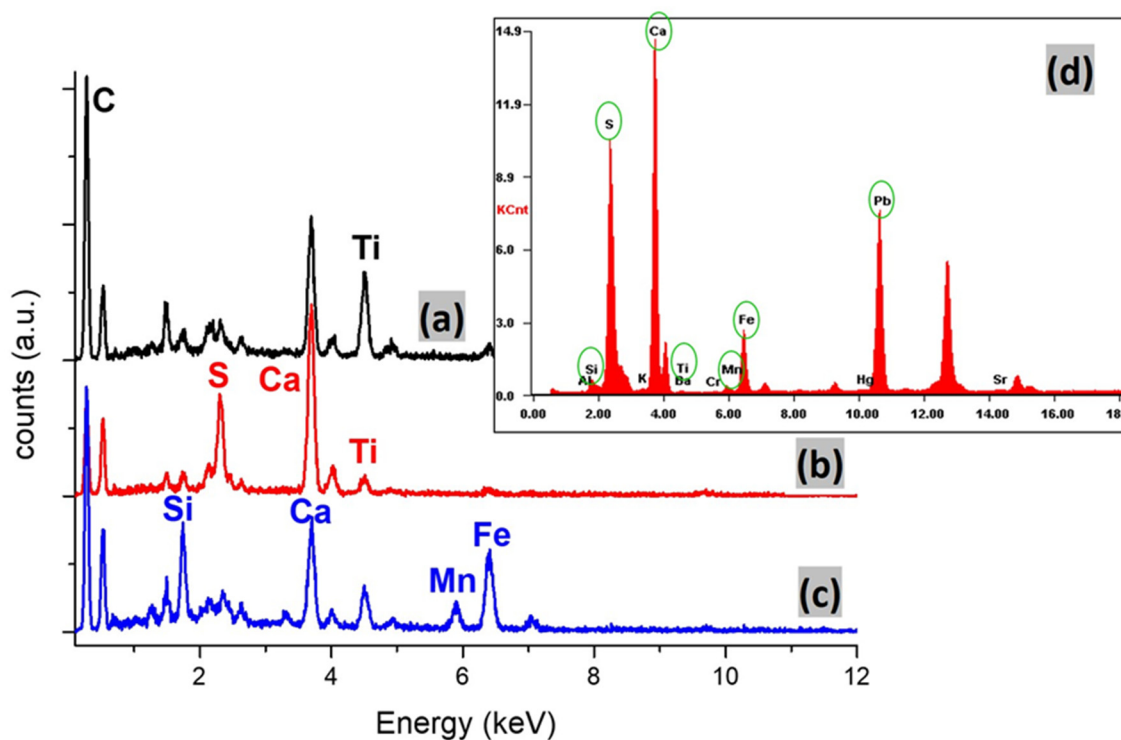

Figure S4. EDX spectra of the turquoise sample: (a) 9, general surface; (b) 9, general support layers; (c) 9, punctual zone 1; (d) 9, general.

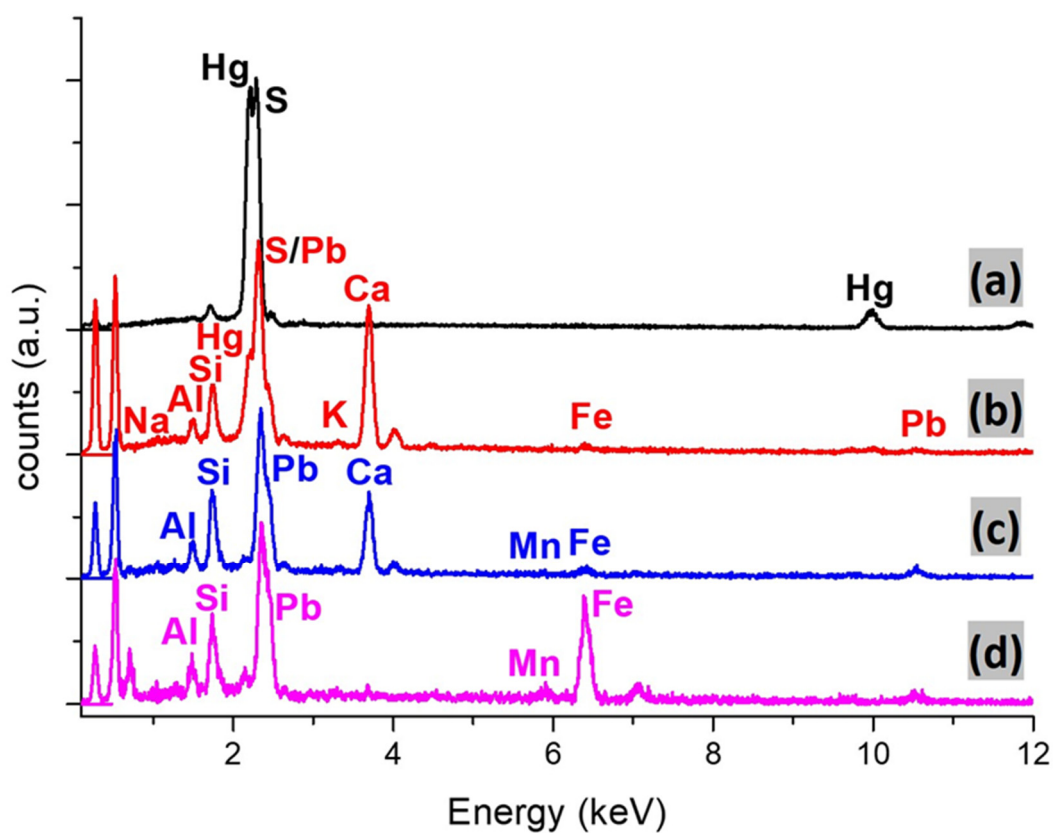

Figure S5. EDX spectra of the red samples: (a) 3, punctual zone 1; (b) 3, general; (c) 11, punctual zone 1; (d) 11, punctual zone 2.

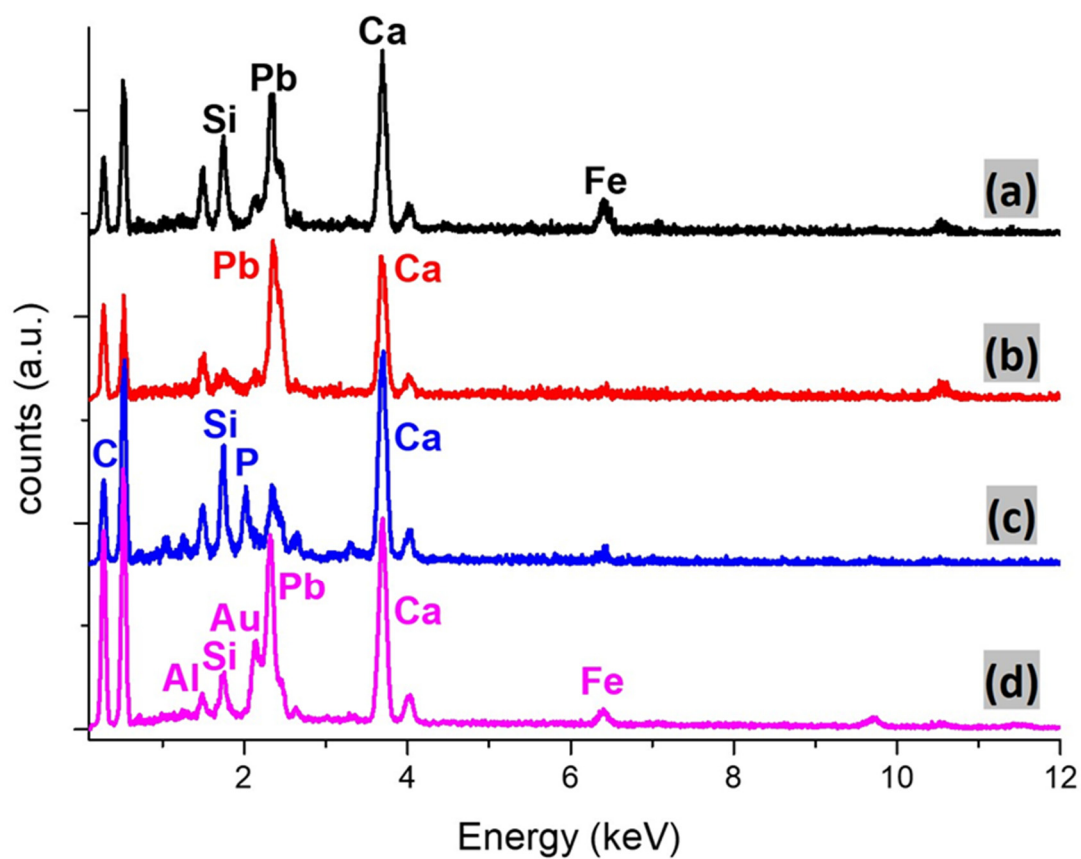

**Figure S6.** EDX spectra of the yellow, black and golden samples: **(a)** yellow 6, general; **(b)** black 8, general support layers; **(c)** black 8, punctual zone 1; **(d)** golden 7, general surface.

**Table S1.** Colourimetric values of the samples.

| Colour | Sample    | L*    | a*     | b*     | Figure |
|--------|-----------|-------|--------|--------|--------|
| Blue   | 1         | 54.65 | -6.49  | -15.58 | 3a     |
|        |           | 53.13 | -8.57  | -11.90 |        |
|        |           | 47.21 | -5.44  | -10.34 |        |
| Green  | 10        | 34.30 | -16.45 | 15.99  | 3b     |
|        |           | 37.07 | -17.37 | 18.84  |        |
|        |           | 34.45 | -17.65 | 16.53  |        |
|        | 4         | 27.68 | -0.84  | 7.92   | 3c     |
|        |           | 27.66 | -0.82  | 8.04   |        |
|        |           | 30.05 | -5.13  | 11.85  |        |
|        | 5         | 26.22 | -6.86  | 2.97   | 3d     |
|        |           | 30.54 | -12.07 | 6.38   |        |
|        |           | 29.34 | -11.39 | 2.79   |        |
|        | Turquoise | 9     | 27.77  | 0.18   | 7.20   |
| 27.98  |           |       | 0.08   | 7.44   |        |
| 29.58  |           |       | 0.51   | 6.67   |        |
| Red    | 3         | 25.92 | 5.30   | 5.97   | 3f     |
|        |           | 28.36 | 7.90   | 6.86   |        |
|        |           | 26.41 | 6.68   | 6.54   |        |
|        | 2         | 26.13 | 1.81   | 6.32   | 3g     |
|        |           | 26.99 | 4.10   | 7.39   |        |
|        |           | 26.13 | 2.05   | 6.07   |        |
|        | 11        | 32.33 | 15.72  | 15.51  | 3h     |
|        |           | 35.43 | 29.57  | 15.56  |        |
|        |           | 38.29 | 31.63  | 14.61  |        |
|        | Yellow    | 6     | 35.77  | 2.44   | 17.96  |
| 39.96  |           |       | 2.57   | 20.67  |        |
| 32.91  |           |       | 3.48   | 15.22  |        |
| Black  | 8         | 31.37 | 1.28   | 9.95   | 3k     |
|        |           | 30.09 | 0.20   | 7.94   |        |
|        |           | 26.87 | -1.75  | 2.45   |        |
